# Supplementary material for: Bifidobacterium longum subsp. infantis ATCC 15697 and Goat Milk Oligosaccharides Show Synergism In Vitro as Anti-Infectives against Campylobacter jejuni
Source: MDPI journal article supplement (doi:10.3390/foods9030348), 2020-03-17
Supplement: s1 [file s1]

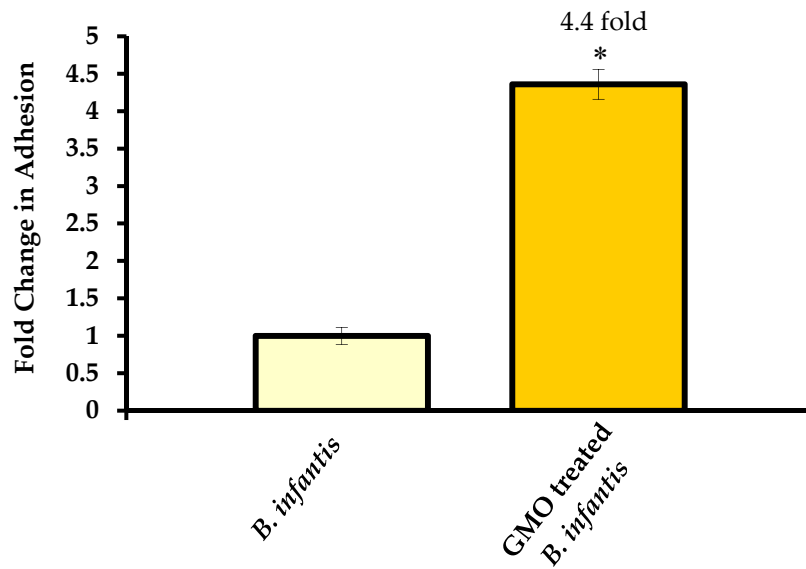

**Figure S1.** Adhesion of *B. longum subsp. infantis* ATCC 15697 to HT-29 cells following incubation with goat milk oligosaccharides. Results are represented as the average of triplicate experiments performed on three separate occasions and are presented as the percentage of adherent cells =  $[\text{CFU/mL of recovered adherent bacteria} \div \text{CFU/mL of inoculum}] \times 100$  and graphed as fold-change relative to percent adhesion of control, with error bars representing the standard deviation. The unpaired non-parametric t-test was used,\*  $p$ -value: <0.05.
